# Supplementary material
Source: PubMed Central journal article supplement (PMC6294135)
Supplement: NIHMS996364-supplement-1.pdf [file NIHMS996364-supplement-1.pdf]

578 **Appendix 1: Supporting information**

| Treatment | $r$                      | $K$                   | $m_1$                 | $m_2$                 |
|-----------|--------------------------|-----------------------|-----------------------|-----------------------|
| L         | -0.095 (-0.098 – -0.092) | NA                    | 0.285 (0.273 – 0.300) | 0.000 (0.000 – 0.001) |
| FL        | -0.050 (-0.052 – -0.049) | NA                    | 0.220 (0.203 – 0.238) | 0.079 (0.069 – 0.089) |
| BL        | -0.241 (-0.247 – -0.234) | NA                    | 0.219 (0.202 – 0.236) | 0.031 (0.022 – 0.042) |
| FBL       | -0.122 (-0.124 – -0.118) | NA                    | 0.292 (0.278 – 0.304) | 0.000 (0.000 – 0.013) |
| H         | 0.247 (0.233 – 0.0261)   | 6.553 (6.453 – 6.653) | 0.325 (0.303 – 0.350) | 0.035 (0.025 – 0.046) |
| FH        | 0.147 (0.137 – 0.156)    | 6.762 (6.589 – 6.934) | 0.152 (0.137 – 0.168) | 0.114 (0.103 – 0.125) |
| BH        | 0.219 (0.207 – 0.236)    | 7.904 (7.783 – 8.025) | 0.369 (0.352 – 0.386) | 0.014 (0.006 – 0.021) |
| FBH       | 0.185 (0.176 – 0.193)    | 3.397 (3.335 – 3.460) | 0.211 (0.237 – 0.237) | 0.161 (0.143 – 0.181) |

579

580 **Table S1. Parameter estimates.** Maximum likelihood fits to experimental data from  
581 treatments where aphids had L- low dispersal and H- high dispersal while alone or in the  
582 presence of the following natural enemies: F- entomopathogenic fungus only, B- ladybird  
583 beetle only, and FB- fungus and beetle combined. Parameters include  $r$ , growth rate of  
584 aphids,  $K$ , carrying capacity of aphids,  $m_1$ , local migration rate, and  $m_2$ , long-distance  
585 migration rate. Values in parentheses represent 95% confidence intervals using likelihood  
586 ratio test.  $K$  could not be estimated in L treatments due to extinctions.

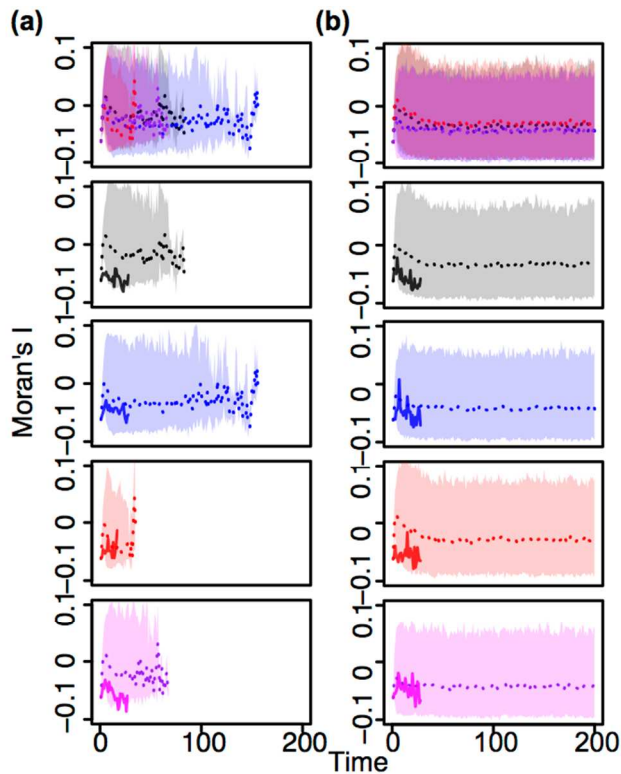

587

588 **Fig. S1. Spatial clustering for 4X5 matrix.** Plots of Moran's I for low (a) and high (b)  
 589 dispersal treatments where aphids were alone (black, second row) or under control by  
 590 fungal pathogen (blue, third row), beetle predator (red, fourth row), or both (purple, fifth  
 591 row). In top row, all plots are overlaid to show differences between treatments. Mean  
 592 Moran's I across all repetitions from experiment are plotted as solid lines and overlaid  
 593 on top of mean model predictions (dotted lines) and 95% confidence intervals constructed  
 594 from 1000 simulations of the model assuming a 4X5 spatial grid with edge effects,  
 595 projected to 200 time steps. Moran's I > 0 indicates clustered, < 0 indicates dispersed and  
 596 0 = random spatial patterns.
